# Supplementary material for: Photocurable silk fibroin-based tissue sealants with enhanced adhesive properties for the treatment of corneal perforations
Source: Royal Society of Chemistry journal article supplement (doi:10.1039/d1tb02502c), 2022-01-01
Supplement: d1tb02502c1.pdf [file d1tb02502c1.pdf]

Supplementary information

**Photocurable silk fibroin-based tissue sealants with enhanced adhesive property for the treatment of corneal perforations**

Rumeysa Tutar<sup>1</sup>, Elif Yüce<sup>2</sup>, Burçin İzbudak<sup>3</sup>, Ayça Bal-Öztürk<sup>3,4,5,6\*</sup>

<sup>1</sup>Department of Chemistry, Faculty of Engineering, Istanbul University-Cerrahpasa, Avcılar, Istanbul, 34320, Turkey

<sup>2</sup>Chemical Engineering Department, Faculty of Engineering, Istanbul University-Cerrahpasa, Avcılar, 34320, Istanbul Turkey

<sup>3</sup>Department of Stem Cell and Tissue Engineering, Institute of Health Sciences, Istinye University, 34010 Istanbul, Turkey

<sup>4</sup>Department of Analytical Chemistry, Faculty of Pharmacy, Istinye University, 34010 Istanbul, Turkey

<sup>5</sup>3D Bioprinting Design&Prototyping R&D Center, Istinye University, 34010, Zeytinburnu, Istanbul Turkey

<sup>6</sup>Nanotechnology Research and Application Center (SUNUM), Sabancı University, Istanbul, Turkey

\* aycabal@gmail.com, aozturk@istinye.edu.tr

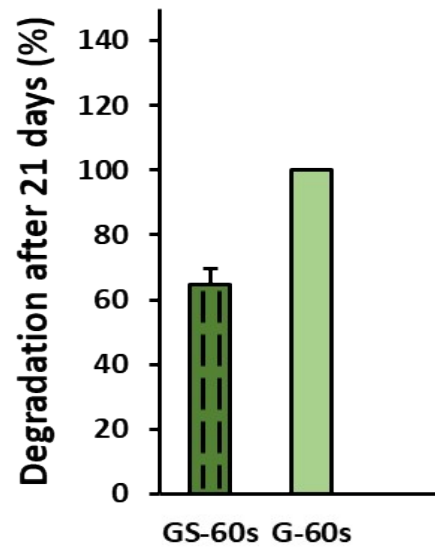

**Figure S1.** Physical characterization of the G-60s and GS-60s tissue sealants: degradation after 21 days.
